# Supplementary material for: Ultrafine NiMoOx nanoparticles confined in mesoporous carbon for the reduction of nitroarenes: effect of the composition and accessibility of the active sites
Source: Royal Society of Chemistry journal article supplement (doi:10.1039/c8ra09026b), 2019-01-01
Supplement: c8ra09026b1.pdf [file c8ra09026b1.pdf]

**Ultrafine NiMoO<sub>x</sub> nanoparticles confined in mesoporous carbon for the  
reduction of nitroarenes: Effect of the composition and accessibility of the active  
sites**

Shuna Li, Yipin Lv, Guolong Song, Cuncheng Li, Daowei Gao\* and

Guozhu Chen\*

School of Chemistry and Chemical Engineering, University of Jinan, Jinan 250022,  
China.

---

\*Corresponding author. Tel: +86 0531-82769181.

Email address: chm\_gaodw@ujn.edu.cn (Daowei Gao), chm\_chengz@ujn.edu.cn  
(Guozhu Chen).

**Table S1.** The XPS parameters of Ni 2p and Mo 3d over different catalysts.

| Area <sup>d</sup> (%) |                 | Binding energy <sup>b</sup> (eV) |       |                 | Sample                        | Binding energy <sup>a</sup> (eV) |                  |                  | Area <sup>c</sup> (%) |                  |
|-----------------------|-----------------|----------------------------------|-------|-----------------|-------------------------------|----------------------------------|------------------|------------------|-----------------------|------------------|
| Ni <sup>2+</sup>      | Ni <sup>0</sup> | Ni(OH) <sub>2</sub>              | NiO   | Ni <sup>0</sup> |                               | Mo <sup>0</sup>                  | Mo <sup>4+</sup> | Mo <sup>6+</sup> | Mo <sup>0</sup>       | MoO <sub>x</sub> |
| 96.4                  | 3.6             | 856.2                            | 855   | 853.0           | NiMoO <sub>x</sub> /MC-PL     | 230.7                            | 232.4            | 235.9            | 22.0                  | 88               |
| 82.2                  | 17.8            | 856.1                            | 854.4 | 852.9           | NiMoO <sub>x</sub> /MC-PL-450 | 230.6                            | 232.3            | 235.5            | 33.6                  | 66.4             |
| 67.5                  | 32.5            | 856.4                            | 854.5 | 852.7           | NiMoO <sub>x</sub> /MC-PL-750 | 230.6                            | 232.3            | 235.7            | 36.3                  | 63.7             |

<sup>a</sup>The binding energy of Mo 3d<sub>3/2</sub>.

<sup>b</sup>The binding energy of Ni 2p<sub>5/2</sub>.

<sup>c</sup>The difference of valence of Mo species. Area = Mo<sup>x</sup>/(Mo<sup>0</sup> + Mo<sup>4+</sup> + Mo<sup>6+</sup>).

<sup>d</sup>The difference of valence of Ni species. Area = Ni<sup>x</sup>/(Ni<sup>0</sup> + Ni<sup>2+</sup>).

**Table S2.** The kinetic constants and TOF of NiMoO<sub>x</sub>/MC-PL at different concentration of NaBH<sub>4</sub>.

| Samples                   | Catalyst amount (mg) | Concentration of NaBH <sub>4</sub> (mol·L <sup>-1</sup> ) | Concentration of 4-NP (mol·L <sup>-1</sup> ) | Time <sup>a</sup> (min) | k (min <sup>-1</sup> ) | K (min <sup>-1</sup> ·g <sup>-1</sup> ) | TOF <sup>b</sup> ×10 <sup>3</sup> (s <sup>-1</sup> ) |
|---------------------------|----------------------|-----------------------------------------------------------|----------------------------------------------|-------------------------|------------------------|-----------------------------------------|------------------------------------------------------|
| NiMoO <sub>x</sub> /MC-PL | 0.5                  | 0.005                                                     | 0.012                                        | 8.5                     | 0.10                   | 200                                     | 42.6                                                 |
| NiMoO <sub>x</sub> /MC-PL | 0.5                  | 0.01                                                      | 0.012                                        | 6.0                     | 0.19                   | 380                                     | 60.4                                                 |
| NiMoO <sub>x</sub> /MC-PL | 0.5                  | 0.02                                                      | 0.012                                        | 2.0                     | 0.48                   | 960                                     | 175.8                                                |
| NiMoO <sub>x</sub> /MC-PL | 0.5                  | 0.03                                                      | 0.012                                        | 2.3                     | 0.41                   | 820                                     | 157.5                                                |
| NiMoO <sub>x</sub> /MC-PL | 0.5                  | 0.04                                                      | 0.012                                        | 1.9                     | 0.49                   | 980                                     | 190.7                                                |

<sup>a</sup>Calculated at 50% of the conversion.

<sup>b</sup>Calculated on the basis of total catalyst and conversion rate of 50%.

**Table S3.** The kinetic constants and TOF of NiMoO<sub>x</sub>/MC-PL under different amount of catalyst in the reduction reaction.

| Samples                   | Catalyst amount (mg) | Concentration of NaBH <sub>4</sub> (mol·L <sup>-1</sup> ) | Concentration of 4-NP (mol·L <sup>-1</sup> ) | Time <sup>a</sup> (min) | k (min <sup>-1</sup> ) | K (min <sup>-1</sup> ·g <sup>-1</sup> ) | TOF <sup>b</sup> ×10 <sup>3</sup> (s <sup>-1</sup> ) |
|---------------------------|----------------------|-----------------------------------------------------------|----------------------------------------------|-------------------------|------------------------|-----------------------------------------|------------------------------------------------------|
| NiMoO <sub>x</sub> /MC-PL | 0.0625               | 0.02                                                      | 0.012                                        | 12.3                    | 0.07                   | 1120                                    | 235.6                                                |
| NiMoO <sub>x</sub> /MC-PL | 0.125                | 0.02                                                      | 0.012                                        | 7.8                     | 0.12                   | 968                                     | 185.8                                                |
| NiMoO <sub>x</sub> /MC-PL | 0.25                 | 0.02                                                      | 0.012                                        | 4.5                     | 0.27                   | 1080                                    | 161                                                  |
| NiMoO <sub>x</sub> /MC-PL | 0.5                  | 0.02                                                      | 0.012                                        | 2.0                     | 0.48                   | 960                                     | 175.8                                                |
| NiMoO <sub>x</sub> /MC-PL | 1.0                  | 0.02                                                      | 0.012                                        | 1.3                     | 1.06                   | 1060                                    | 125.5                                                |

<sup>a</sup>Calculated at 50% of the conversion.

<sup>b</sup>Calculated on the basis of total catalyst and conversion rate of 50%.

**Table S4.** The kinetic constants and TOF of NiMoO<sub>x</sub>/MC-PL under different amount of 4-NP.

| Samples                   | Catalyst amount (mg) | Concentration of NaBH <sub>4</sub> (mol·L <sup>-1</sup> ) | Amount of 4-NP (μL) | Time <sup>a</sup> (min) | k (min <sup>-1</sup> ) | K (min <sup>-1</sup> ·g <sup>-1</sup> ) | TOF <sup>b</sup> ×10 <sup>3</sup> (s <sup>-1</sup> ) |
|---------------------------|----------------------|-----------------------------------------------------------|---------------------|-------------------------|------------------------|-----------------------------------------|------------------------------------------------------|
| NiMoO <sub>x</sub> /MC-PL | 0.5                  | 0.02                                                      | 10                  | 1.1                     | 0.77                   | 1540                                    | 329.4                                                |
| NiMoO <sub>x</sub> /MC-PL | 0.5                  | 0.02                                                      | 15                  | 2.4                     | 0.67                   | 1340                                    | 150.9                                                |
| NiMoO <sub>x</sub> /MC-PL | 0.5                  | 0.02                                                      | 20                  | 1.8                     | 0.52                   | 1040                                    | 201.3                                                |
| NiMoO <sub>x</sub> /MC-PL | 0.5                  | 0.02                                                      | 25                  | 2.9                     | 0.46                   | 920                                     | 124.9                                                |
| NiMoO <sub>x</sub> /MC-PL | 0.5                  | 0.02                                                      | 30                  | 4.3                     | 0.25                   | 500                                     | 84.0                                                 |

<sup>a</sup>Calculated at 50% of the conversion.

<sup>b</sup>Calculated on the basis of total catalyst and conversion rate of 50%.

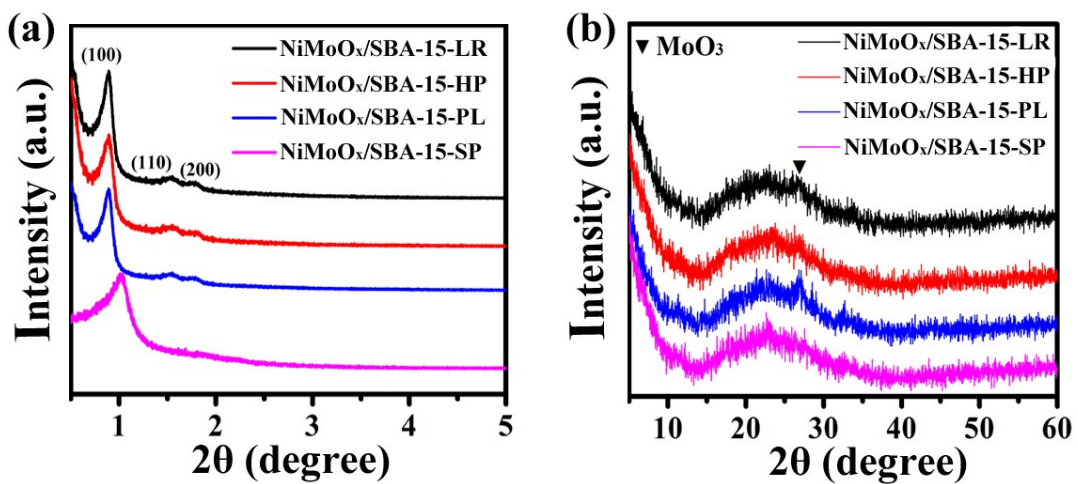

**Fig. S1.** XRD patterns of various morphologies of NiMoO<sub>x</sub>/SBA-15 (a, b) in the small-angle and wide-angle.

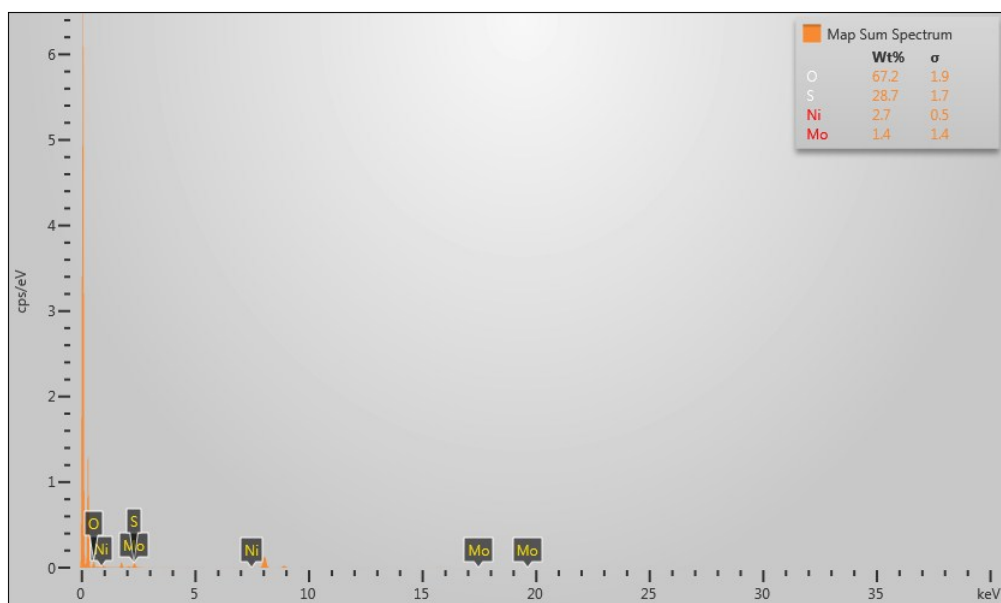

**Fig. S2.** The EDS analysis of NiMoS/MC-PL.

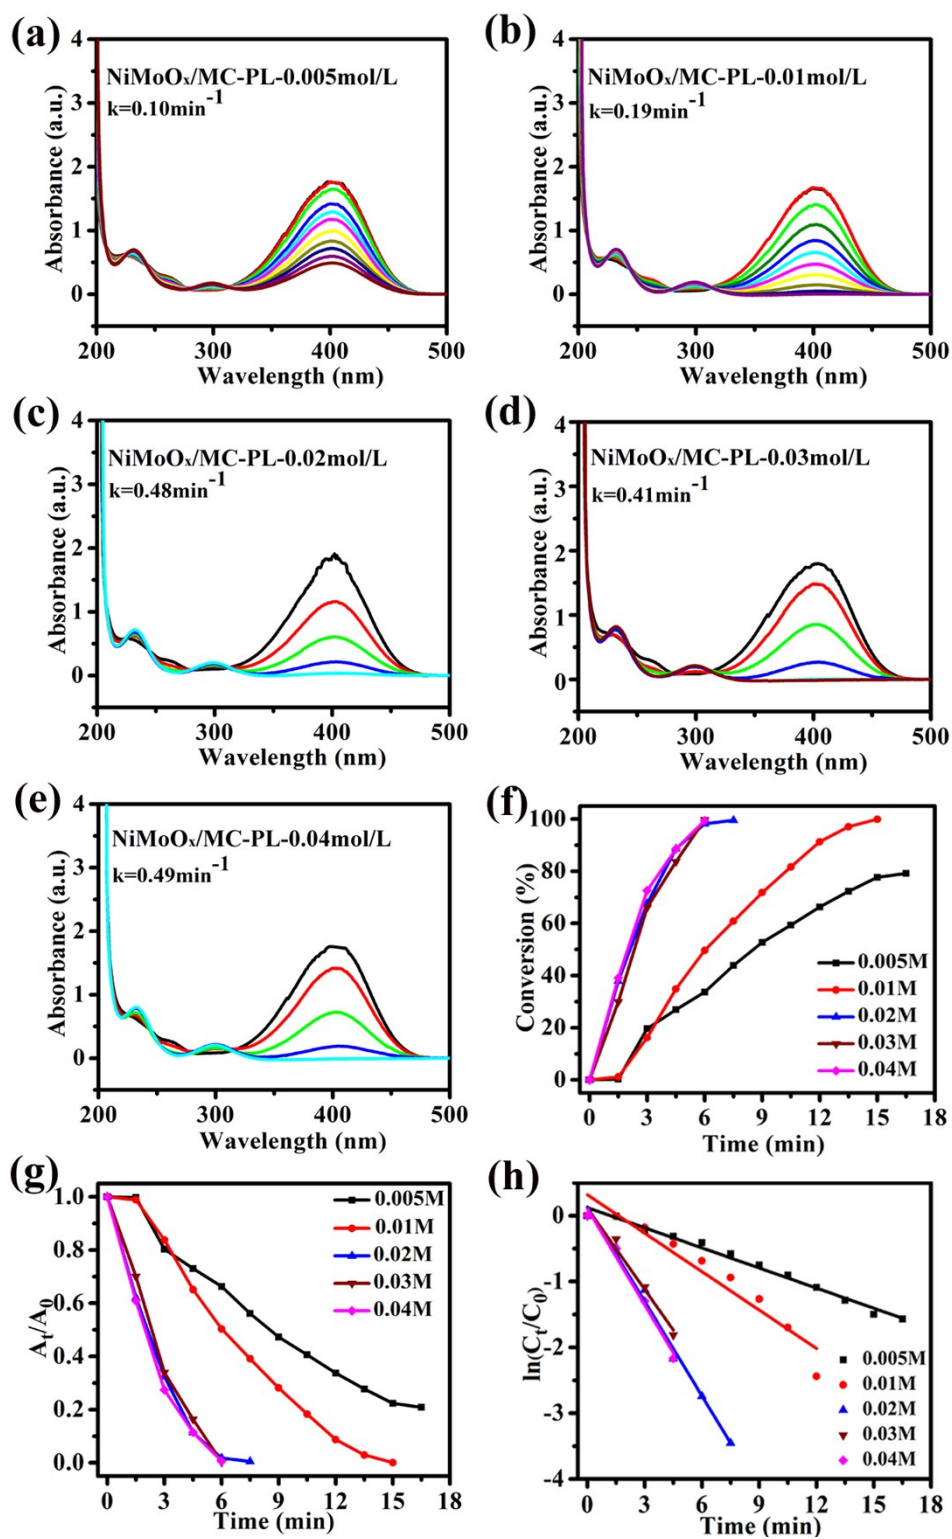

**Fig. S3.** The reduction of 4-NP recorded every 1.5 min with different concentration of the NaBH<sub>4</sub> (a-e); Time dependent conversion of 4-NP over the catalysts (f); The relationship between the  $A_t/A_0$  and reaction time (g); Plots of  $\ln(C_t/C_0)$  versus reaction time at different concentration of NaBH<sub>4</sub> for reduction 4-NP (h).

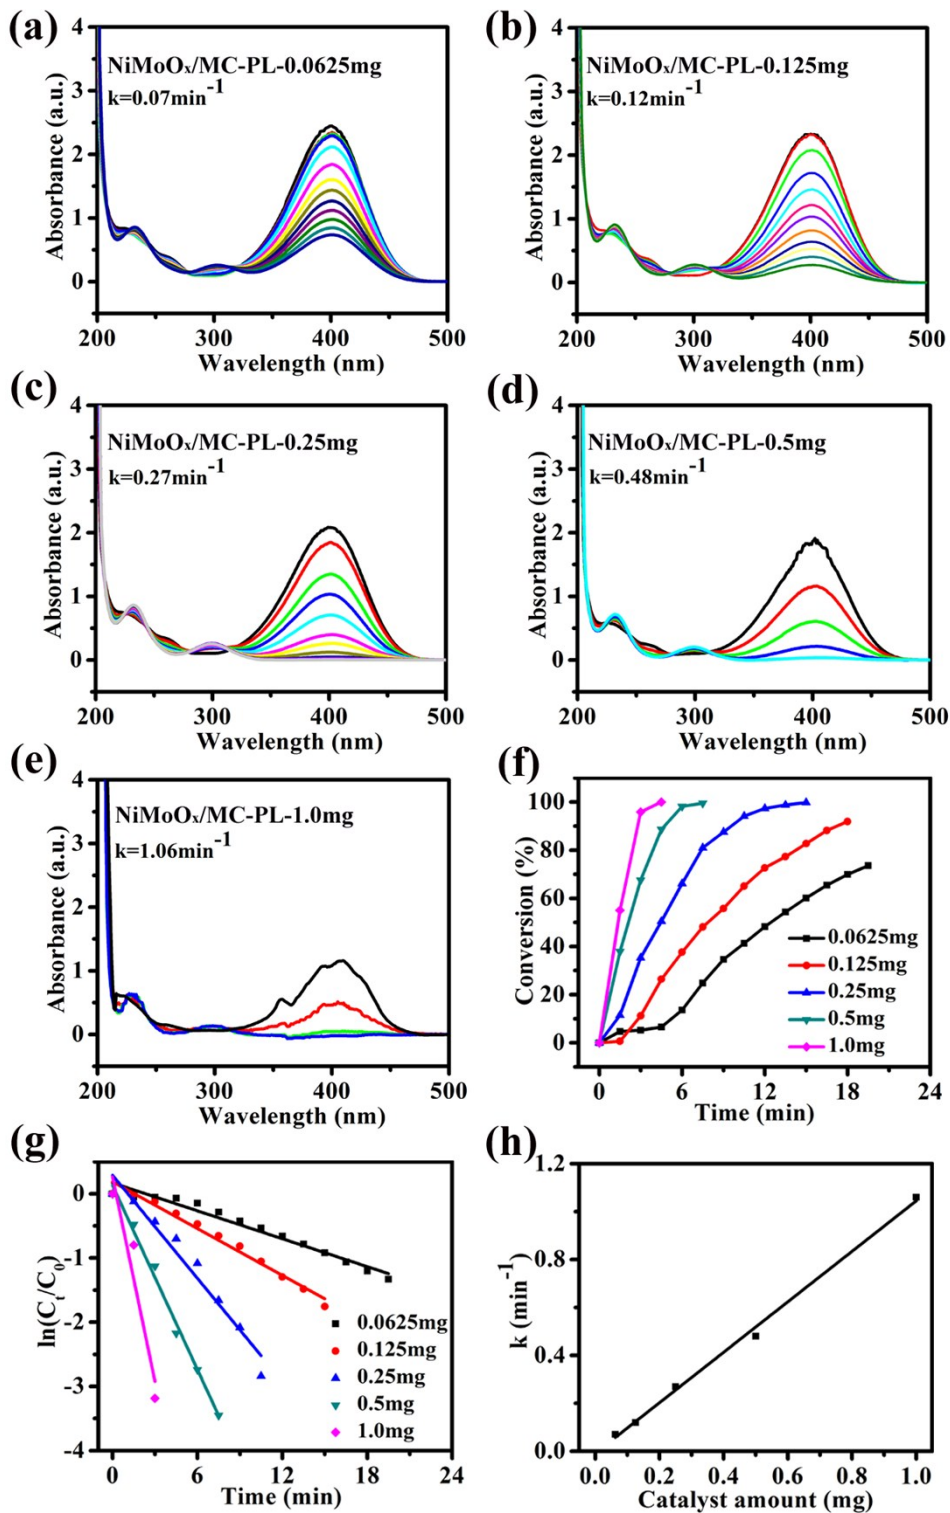

**Fig. S4.** The reduction of 4-NP recorded every 1.5 min with different amount of catalyst (a-e); Plots of conversion versus time over the different amount of catalyst (f); The relationship between the  $\ln(C_t/C_0)$  and reaction time for reduction 4-NP (g); The correlation between the  $k$  and amount of catalyst (h).



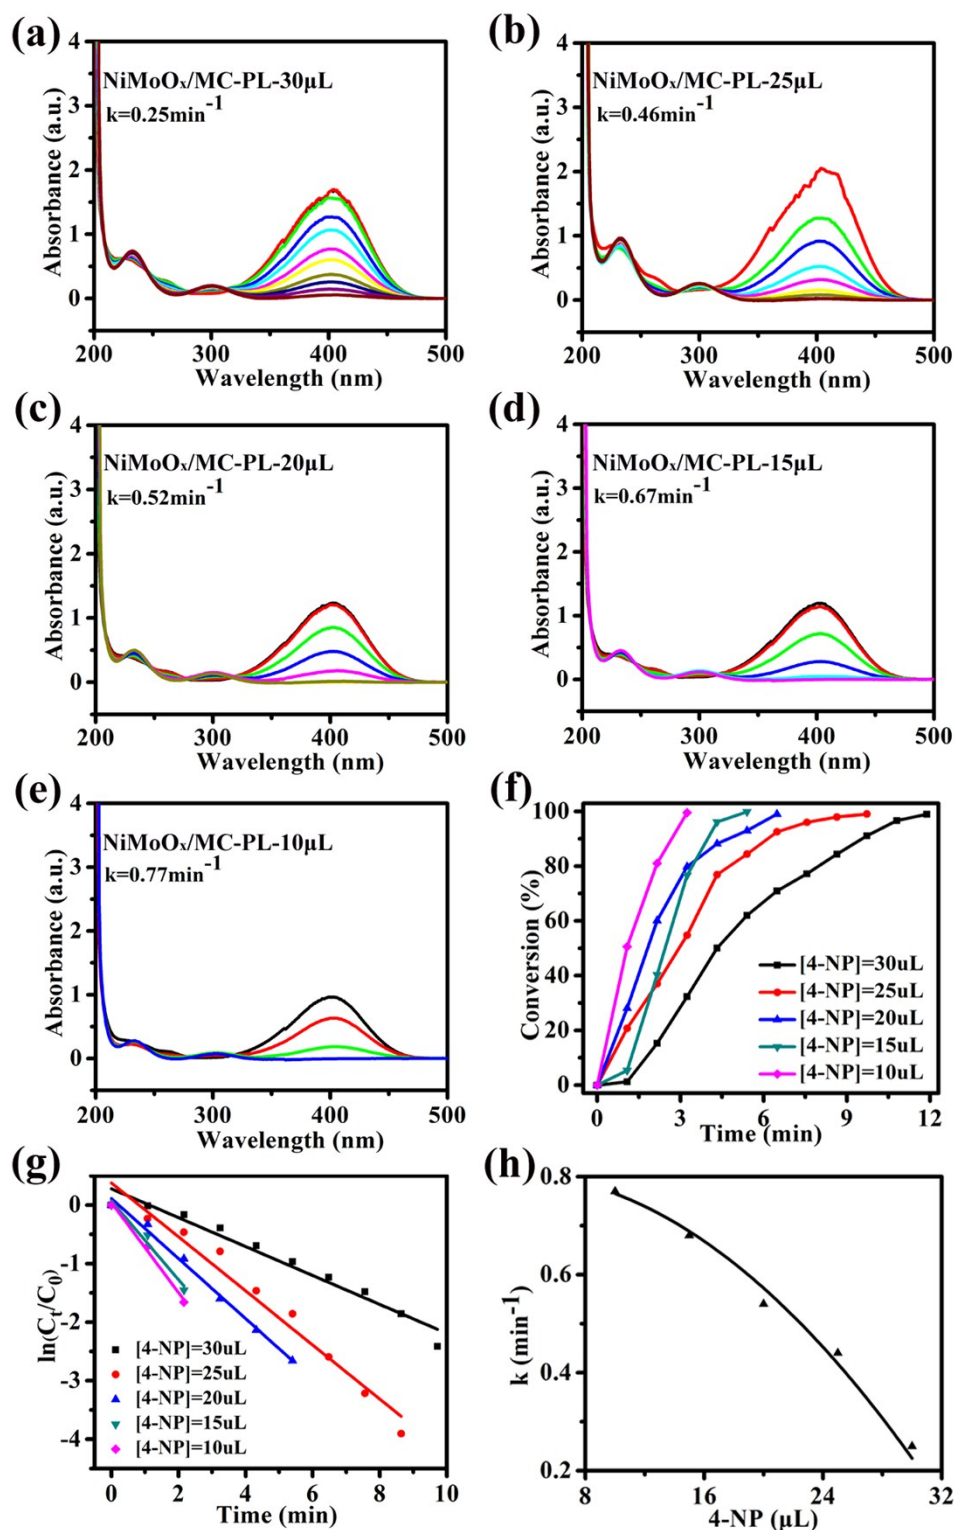

**Fig. S5.** The reduction of 4-NP recorded every 1.08 min with different amount of 4-NP (a-e); Plots of conversion versus time over the different amount 4-NP (f); The relationship between the  $\ln(C_t/C_0)$  and reaction time (g); The correlation between the  $k$  and amount of 4-NP (h).
